# Supplementary material for: Improving the Accuracy of Single-Nucleotide Variant Diagnosis Using On–Off Discriminating Primers
Source: MDPI journal article supplement (doi:10.3390/bios13030380), 2023-03-13
Supplement: s1 [file s1]

Supporting Information for

# Improving the accuracy of single-nucleotide variant diagnosis using on-off discriminating primers

Juny Shin, Cheulhee Jung\*

\*Corresponding Author: Cheulhee Jung

Email: [damo363@korea.ac.kr](mailto:damo363@korea.ac.kr)

This file includes:

**Supplementary Figure S1:** Optimization of Soo-PCR primer annealing temperatures for high specificity using various 3'-end tailing structure lengths

**Supplementary Figure S2:** Validation of Soo-PCR assay sensitivity and specificity for various combinations of WT gDNA and MT gDNA for KRAS G12D using polyacrylamide gel electrophoresis (PAGE).

**Supplementary Figure S3:** Standard curves (including values of  $R^2$ ) of each gene for Figure 5 and Table 4.

**Supplementary Table S1:** Summary of oligonucleotides designed for KRAS G12D

**Supplementary Table S2:** Summary of oligonucleotides designed for EGFR L858R

**Supplementary Table S3:** Summary of oligonucleotides designed for EGFR T790M

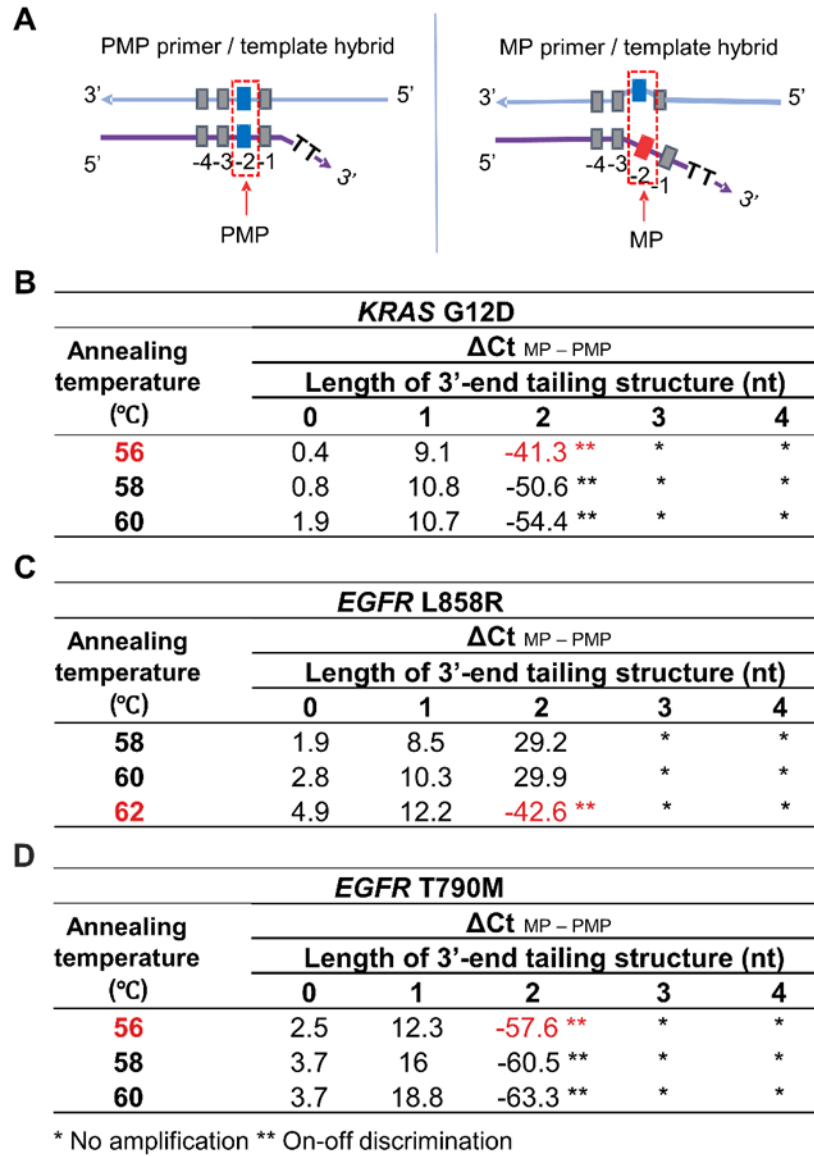

**Figure S1.** Optimization of Soo-PCR primer annealing temperatures for high specificity using various 3'-end tailing structure lengths. (A) Schematic illustration of the PMP primer/template hybrid (left) and the MP primer/template hybrid (right) containing Soo-PCR primers with a 3'-end tailing structure. (B) Real-time PCR performance ( $\Delta Ct_{MP-PMP}$ ) of Soo-PCR primers with a 3'-end tailing structure for PMP and MP primer/template containing *KRAS* G12D (c.35G>A) at various annealing temperatures. (C) Real-time PCR performance ( $\Delta Ct_{MP-PMP}$ ) of Soo-PCR primers with a 3'-end tailing structure for PMP and MP primer/template containing *EGFR* L858R (c.2573T>G) at various annealing temperatures. (D) Real-time PCR performance ( $\Delta Ct_{MP-PMP}$ ) of Soo-PCR primers with a 3'-end tailing structure for PMP and MP primer/template containing *EGFR* T790M (c.2369C>T) at various annealing temperatures. PMP: perfect-match at the penultimate (-2) base, MP: mismatch at the penultimate (-2) base; Ct, threshold cycle; template, 1,500 copies of wild-type genomic DNA (Horizon) containing only WT allelic frequency (AF) for each target;  $\Delta Ct_{MP-PMP}$ , Ct of MP primer/template hybrid – Ct of PMP primer/template hybrid.

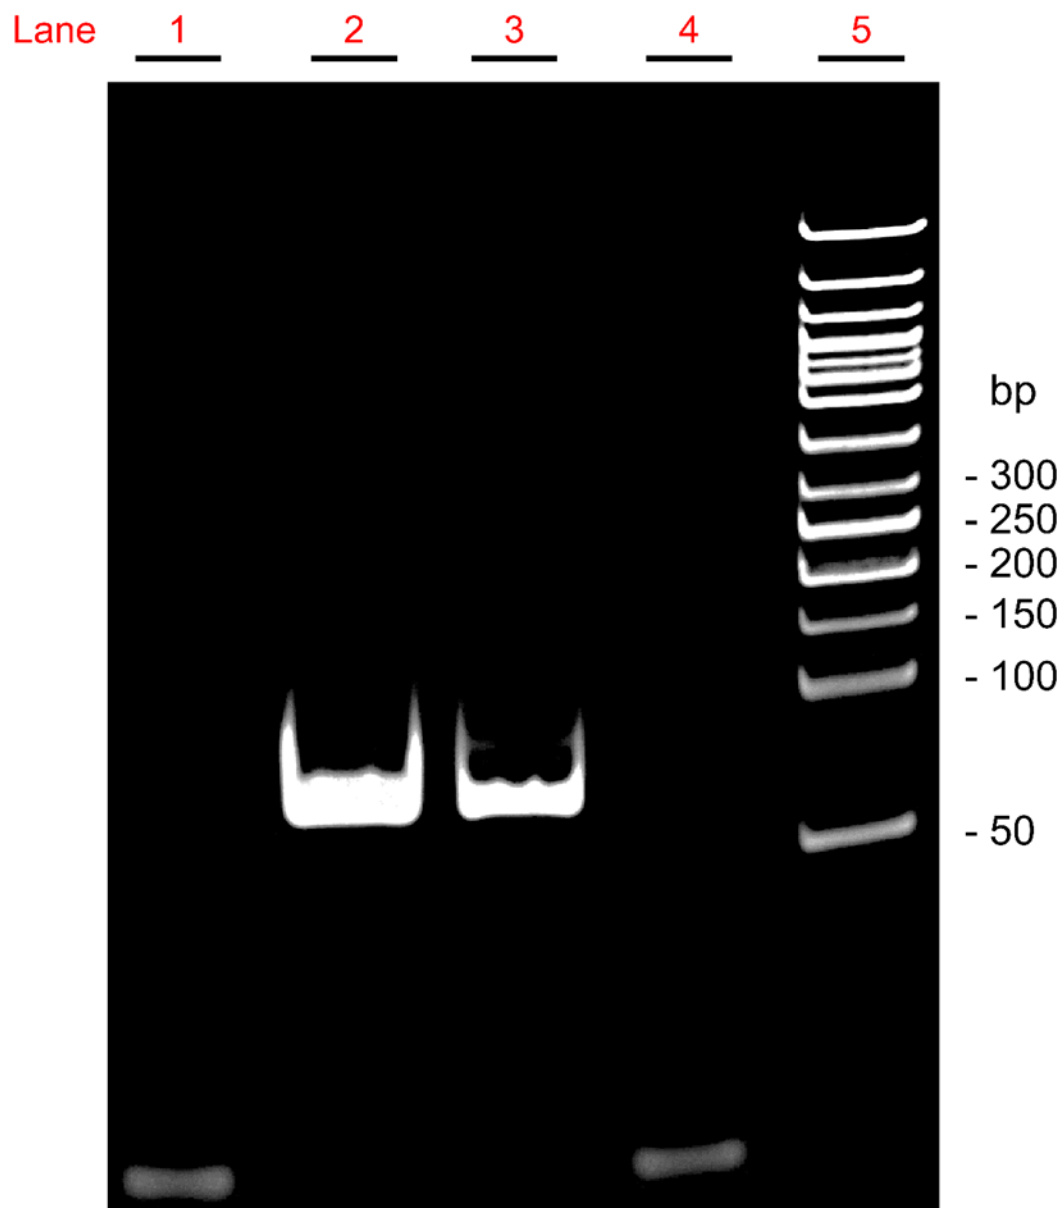

**Figure S2.** Validation of Soo-PCR assay sensitivity and specificity for various combinations of WT gDNA and MT gDNA for KRAS G12D using polyacrylamide gel electrophoresis (PAGE). PAGE result of the Soo-PCR assay products. Each Soo-PCR assay used a combination of WT and MT gDNA with a total of 135,000 copies. The PCR product size was 65 bp. Lane 1, 135,000 copies of WT gDNA; lane 2, 7,500 copies of MT and 127,500 copies WT of gDNA; lane 3, 750 copies of MT and 135,750 copies of WT gDNA; lane 4, 0 copies of MT and 0 copies of WT gDNA (control); lane 5, 50 bp DNA Ladder (New England Biolabs, Ipswich, MA, USA). All PCR reactions (lanes 1–4) had the same conditions except for the template.

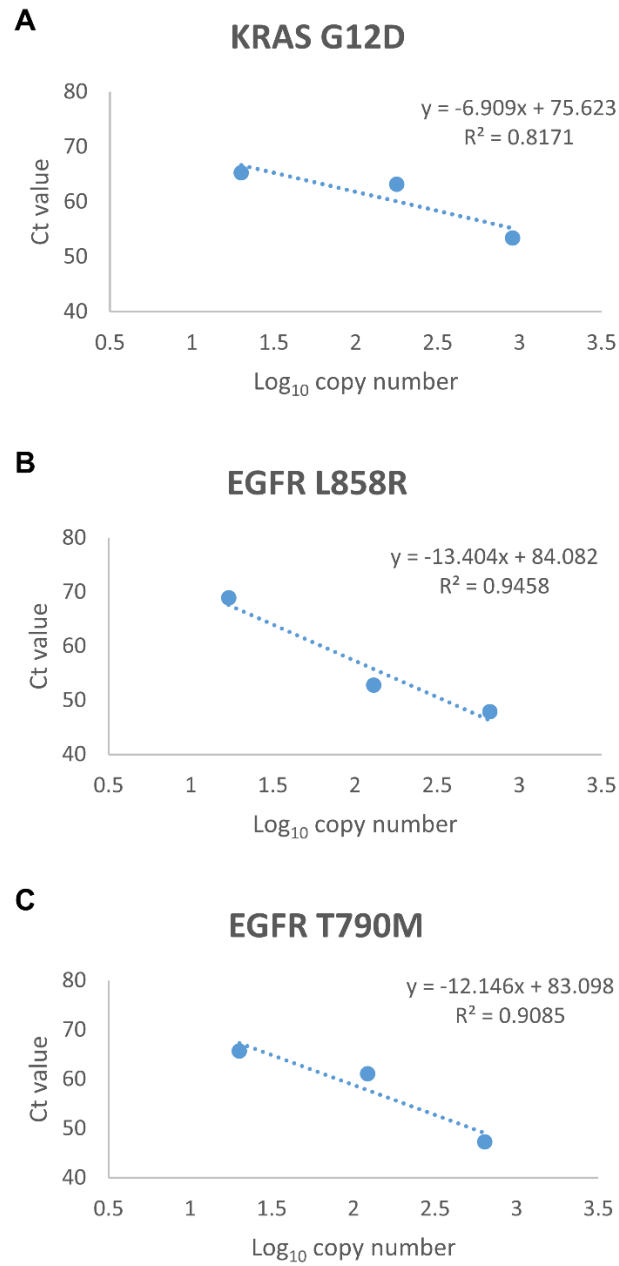

**Figure S3.** Standard curves (including values of  $R^2$ ) of each gene for Figure 5 and Table 4. (A) Standard curve for KRAS G12D. (B) Standard curve for EGFR L858R. (C) Standard curve for EGFR T790M.

**Table S1.** Summary of oligonucleotides designed for KRAS G12D

| Oligo Name                  |                                               | Sequence* (5'-3')                                                                                                                                                                                                                                                                                         | Length (nt) | Purification |
|-----------------------------|-----------------------------------------------|-----------------------------------------------------------------------------------------------------------------------------------------------------------------------------------------------------------------------------------------------------------------------------------------------------------|-------------|--------------|
| Ultramer                    |                                               |                                                                                                                                                                                                                                                                                                           |             |              |
| G12D_3'P-<br>WT_Ultramer_v1 |                                               | AAG GCC TGC TGA AAA TGA<br>CTG AAT ATA AAC TTG TGG<br>TAG TTG GAG CTG GTG GCG<br>TAG GCA AGA GTG CCT TGA<br>CGA TAC AGC TAA TTC AGA<br>ATC ATT TTG TGG ACG AAT<br>ATG ATC CAA CAA TAG AGG<br>TAA ATC TTG TTT TAA TAT<br>GCA TAT TAC TGG TGC AGG<br>ACC ATT CTT TGA TAC AGA<br>TAA AGG TTT CTC TGA /3Phos/ | 195         | PAGE         |
| G12D_3'P-<br>MT_Ultramer_v1 |                                               | AAG GCC TGC TGA AAA TGA<br>CTG AAT ATA AAC TTG TGG<br>TAG TTG GAG CTG ATG GCG<br>TAG GCA AGA GTG CCT TGA<br>CGA TAC AGC TAA TTC AGA<br>ATC ATT TTG TGG ACG AAT<br>ATG ATC CAA CAA TAG AGG<br>TAA ATC TTG TTT TAA TAT<br>GCA TAT TAC TGG TGC AGG<br>ACC ATT CTT TGA TAC AGA<br>TAA AGG TTT CTC TGA /3Phos/ | 195         | PAGE         |
| Forward Primer (FP)         | Length of 3'-end<br>tailing<br>structure (nt) |                                                                                                                                                                                                                                                                                                           |             |              |
| KRAS G12D_MT_T0             | 0                                             | TTG TGG TAG TTG GAG CTG AT                                                                                                                                                                                                                                                                                | 20          | HPLC         |
| KRAS G12D_WT_T0             | 0                                             | TTG TGG TAG TTG GAG CTG GT                                                                                                                                                                                                                                                                                | 20          | HPLC         |
| KRAS G12D_MT_T1             | 1                                             | TTG TGG TAG TTG GAG CTG AT<br><u>I</u>                                                                                                                                                                                                                                                                    | 21          | HPLC         |
| KRAS G12D_WT_T1             | 1                                             | TTG TGG TAG TTG GAG CTG GT<br><u>I</u>                                                                                                                                                                                                                                                                    | 21          | HPLC         |
| KRAS G12D_MT_T2             | 2                                             | TTG TGG TAG TTG GAG CTG AT<br><u>II</u>                                                                                                                                                                                                                                                                   | 22          | HPLC         |
| KRAS G12D_WT_T2             | 2                                             | TTG TGG TAG TTG GAG CTG GT<br><u>II</u>                                                                                                                                                                                                                                                                   | 22          | HPLC         |
| KRAS G12D_MT_T3             | 3                                             | TTG TGG TAG TTG GAG CTG AT<br><u>III</u>                                                                                                                                                                                                                                                                  | 23          | HPLC         |
| KRAS G12D_WT_T3             | 3                                             | TTG TGG TAG TTG GAG CTG GT<br><u>III</u>                                                                                                                                                                                                                                                                  | 23          | HPLC         |
| KRAS G12D_MT_T4             | 4                                             | TTG TGG TAG TTG GAG CTG AT<br><u>IIII</u>                                                                                                                                                                                                                                                                 | 24          | HPLC         |

|                               |   |                                                  |    |      |
|-------------------------------|---|--------------------------------------------------|----|------|
| <i>KRAS</i> G12D_WT_T4        | 4 | TTG TGG TAG TTG GAG CTG <b>GT</b><br><u>TTTT</u> | 24 | HPLC |
| Reverse Primer (RP)           |   |                                                  |    |      |
| <i>KRAS</i> G12D_RP           |   | ATG ATT CTG AAT TAG CTG<br>TAT CGT C             | 25 | HPLC |
| TaqMan Probe                  |   |                                                  |    |      |
| <i>KRAS</i> G12D_TaqMan Probe |   | /56-FAM/ CA+C T+CT +T+G+C +CT<br>/3IABkFQ/       | 11 | HPLC |

\* Bold font: single nucleotide variant (SNV); Underline: 3'-end tailing structure

PAGE, polyacrylamide gel electrophoresis; HPLC, high-performance liquid chromatography

**Table S2.** Summary of oligonucleotides designed for EGFR L858R

| Oligo Name              |                                         | Sequence* (5'-3')                                   | Length (nt) | Purification |
|-------------------------|-----------------------------------------|-----------------------------------------------------|-------------|--------------|
| Forward Primer (FP)     | Length of 3'-end tailing structure (nt) |                                                     |             |              |
| <i>EGFR</i> L858R_WT_T0 | 0                                       | CA AGA TCA CAG ATT TTG<br>GGC TG                    | 22          | HPLC         |
| <i>EGFR</i> L858R_MT_T0 | 0                                       | CA AGA TCA CAG ATT TTG<br>GGC <b>GG</b>             | 22          | HPLC         |
| <i>EGFR</i> L858R_WT_T1 | 1                                       | CA AGA TCA CAG ATT TTG<br>GGC TG <u>T</u>           | 23          | HPLC         |
| <i>EGFR</i> L858R_MT_T1 | 1                                       | CA AGA TCA CAG ATT TTG<br>GGC <b>GG</b> <u>T</u>    | 23          | HPLC         |
| <i>EGFR</i> L858R_WT_T2 | 2                                       | CA AGA TCA CAG ATT TTG<br>GGC TG <u>TT</u>          | 24          | HPLC         |
| <i>EGFR</i> L858R_MT_T2 | 2                                       | CA AGA TCA CAG ATT TTG<br>GGC <b>GG</b> <u>TT</u>   | 24          | HPLC         |
| <i>EGFR</i> L858R_WT_T3 | 3                                       | CA AGA TCA CAG ATT TTG<br>GGC TG <u>TTT</u>         | 25          | HPLC         |
| <i>EGFR</i> L858R_MT_T3 | 3                                       | CA AGA TCA CAG ATT TTG<br>GGC <b>GG</b> <u>TTT</u>  | 25          | HPLC         |
| <i>EGFR</i> L858R_WT_T4 | 4                                       | CA AGA TCA CAG ATT TTG<br>GGC TG <u>TTTT</u>        | 26          | HPLC         |
| <i>EGFR</i> L858R_MT_T4 | 4                                       | CA AGA TCA CAG ATT TTG<br>GGC <b>GG</b> <u>TTTT</u> | 26          | HPLC         |
| Reverse Primer (RP)     |                                         |                                                     |             |              |

|                                |  |                                            |    |      |
|--------------------------------|--|--------------------------------------------|----|------|
| <i>EGFR</i> L858R_RP           |  | GCC TCC TTC TGC ATG GTA TT                 | 20 | HPLC |
| TaqMan Probe                   |  |                                            |    |      |
| <i>EGFR</i> L858R_TaqMan Probe |  | /56-FAM/ GCT +GG+G T+GC +GG+A AG /3IABkFQ/ | 14 | HPLC |

\* Bold font: single nucleotide variant (SNV); Underline: 3'-end tailing structure  
HPLC, high-performance liquid chromatography

**Table S3.** Summary of oligonucleotides designed for *EGFR* T790M

| Oligo Name              |                                         | Sequence* (5'-3')                      | Length (nt) | Purification |
|-------------------------|-----------------------------------------|----------------------------------------|-------------|--------------|
| Forward Primer (FP)     | Length of 3'-end tailing structure (nt) |                                        |             |              |
| <i>EGFR</i> T790M_WT_T0 | 0                                       | ACC GTG CAG CTC ATC<br>ACG             | 18          | HPLC         |
| <i>EGFR</i> T790M_MT_T0 | 0                                       | ACC GTG CAG CTC ATC<br>ATG             | 18          | HPLC         |
| <i>EGFR</i> T790M_WT_T1 | 1                                       | ACC GTG CAG CTC ATC<br>ACG <u>T</u>    | 19          | HPLC         |
| <i>EGFR</i> T790M_MT_T1 | 1                                       | ACC GTG CAG CTC ATC<br>ATG <u>T</u>    | 19          | HPLC         |
| <i>EGFR</i> T790M_WT_T2 | 2                                       | ACC GTG CAG CTC ATC<br>ACG <u>TT</u>   | 20          | HPLC         |
| <i>EGFR</i> T790M_MT_T2 | 2                                       | ACC GTG CAG CTC ATC<br>ATG <u>TT</u>   | 20          | HPLC         |
| <i>EGFR</i> T790M_WT_T3 | 3                                       | ACC GTG CAG CTC ATC<br>ACG <u>TTT</u>  | 21          | HPLC         |
| <i>EGFR</i> T790M_MT_T3 | 3                                       | ACC GTG CAG CTC ATC<br>ATG <u>TTT</u>  | 21          | HPLC         |
| <i>EGFR</i> T790M_WT_T4 | 4                                       | ACC GTG CAG CTC ATC<br>ACG <u>TTTT</u> | 22          | HPLC         |
| <i>EGFR</i> T790M_MT_T4 | 4                                       | ACC GTG CAG CTC ATC<br>ATG <u>TTTT</u> | 22          | HPLC         |
| Reverse Primer (RP)     |                                         |                                        |             |              |
| <i>EGFR</i> T790M_RP    |                                         | C TTT GTG TTC CCG GAC<br>ATA GT        | 21          | HPLC         |

|                                |  |                                               |    |      |
|--------------------------------|--|-----------------------------------------------|----|------|
| TaqMan Probe                   |  |                                               |    |      |
| <i>EGFR</i> T790M_TaqMan Probe |  | /56-FAM/ C A+TG +CC+C<br>T+TC GGC T /3IABkFQ/ | 14 | HPLC |

\* Bold font: single nucleotide variant (SNV); Underline: 3'-end tailing structure

HPLC, high-performance liquid chromatography
